# Supplementary material for: Atractylodin Suppresses TGF-β-Mediated Epithelial-Mesenchymal Transition in Alveolar Epithelial Cells and Attenuates Bleomycin-Induced Pulmonary Fibrosis in Mice
Source: MDPI journal article supplement (doi:10.3390/ijms222011152), 2021-10-15
Supplement: s1 [file s1]

# Supplementary Figure S1

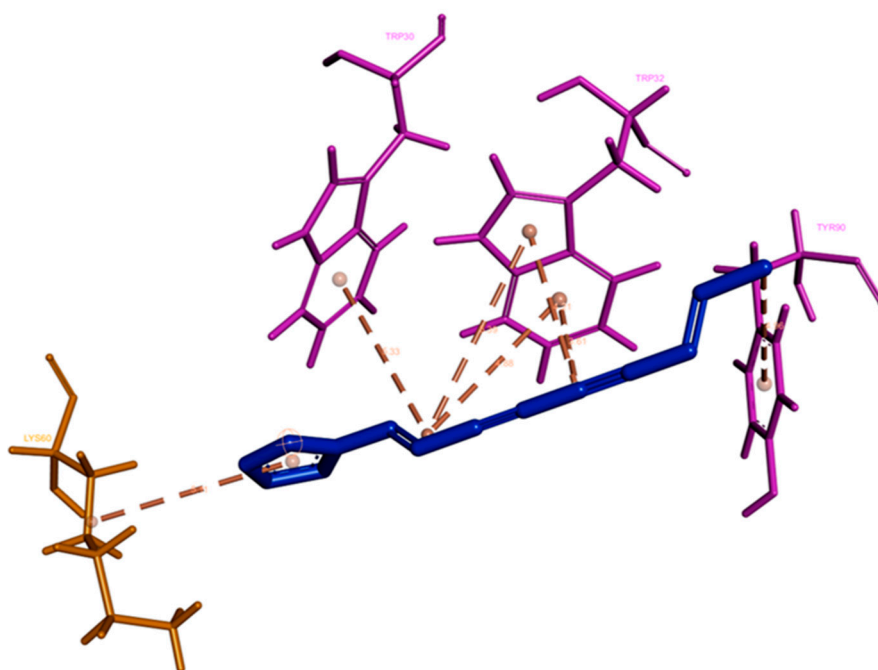

Supplemental Figure S1. Molecular interaction between atractylodin and the nearby amino acid residuals of TGF- $\beta$ 1. The interactions between the 4 residuals (Trp30, Trp32, Tyr90 and Lys60) with atractylodin are a pi-alkyl interaction.

**Supplementary Table S1.** List of primers used for real-time PCR analysis

| Gene              | Forward primer                | Reverse primer                  |
|-------------------|-------------------------------|---------------------------------|
| type I collagen   | 5'-CTGGCCTCGGAGGAACTTT-3'     | 5'-TCCGGTTGATTTCTCATCATAGC-3'   |
| type III collagen | 5'-TGGAGTGTCTGGACCAAAAGG-3'   | 5'-TGATCCCAGCAATCCCAAGT-3'      |
| SNAIL             | 5'- CCCCAATCGGAAGCCTAACT-3'   | 5'GCTGGAAGGTAAACTCTGGATTAGA-3'  |
| SLUG              | 5'- TCGGGCAAGGCGTTTT -3'      | 5'-TCCCCCGTGTGAGTTCTAATG-3'     |
| TWIST             | 5'-ACGCTGCCCTCGGACAA-3'       | 5'- TCGCTCTGGAGGACCTGGTA-3'     |
| ZEB1              | 5'-CACCATCCCCATCACCTCTAA-3'   | 5'-GCACCCTCAGCTGTGTACAAGT-3'    |
| ZEB2              | 5'-GGAGAAAGTACCAGCGGAAACA-3'  | 5'-TCTAGGCCTGACATGTAGTCTTGTG-3' |
| E-cadherin        | 5'-GTCACTGACACCAACGATAATCCT-3 | 5'-GGCACCTGACCCTTGTACGT-3'      |
| vimentin          | 5'-AATGACCGCTTCGCCAACT-3'     | 5'-ATCTTATTCTGCTGCTCCAGGAA-3'   |
| $\alpha$ -SMA     | 5'-TCCCTGGAGAAGAGCTACGAACT-3' | 5'-AAGCGTTCGTTTCCAATGGT-3'      |
| GAPDH             | 5'-ACCCAGAAGACTGTGGATGG-3'    | 5'-TGCTGTAGCCAAATTCGTTG-3'      |
